# Supplementary material for: Molecular docking and molecular dynamics simulation studies on the adsorption/desorption behavior of bone morphogenetic protein-7 on the β-tricalcium phosphate surface
Source: Royal Society of Chemistry journal article supplement (doi:10.1039/d0cp01950j), 2020-01-01
Supplement: d0cp01950j1.pdf [file d0cp01950j1.pdf]

## Electronic Supplementary Information

for

### **Molecular Docking and Molecular Dynamics Simulation Studies on Adsorption/Desorption Behavior of Bone Morphogenetic Protein-7 on $\beta$ -tricalcium Phosphate Surface**

Xiaoyu Zhao,<sup>a</sup> Zhiyu Xue,<sup>a</sup> Kefeng Wang,<sup>\*b</sup> Xin Wang,<sup>\*a</sup> and Dingguo Xu<sup>a, c</sup>

<sup>a</sup> *College of Chemistry, Sichuan University, Chengdu, Sichuan 610064, PR China.*

<sup>b</sup> *National Engineering Research Center for Biomaterials, Sichuan University, Chengdu, Sichuan 610064, PR China.*

<sup>c</sup> *Research Center for Material Genome Engineering, Sichuan University, Chengdu, Sichuan 610065, PR China.*

\*Corresponding authors.

E-mail address: fencal@163.com (K. Wang)

wangxin@scu.edu.cn (X. Wang)

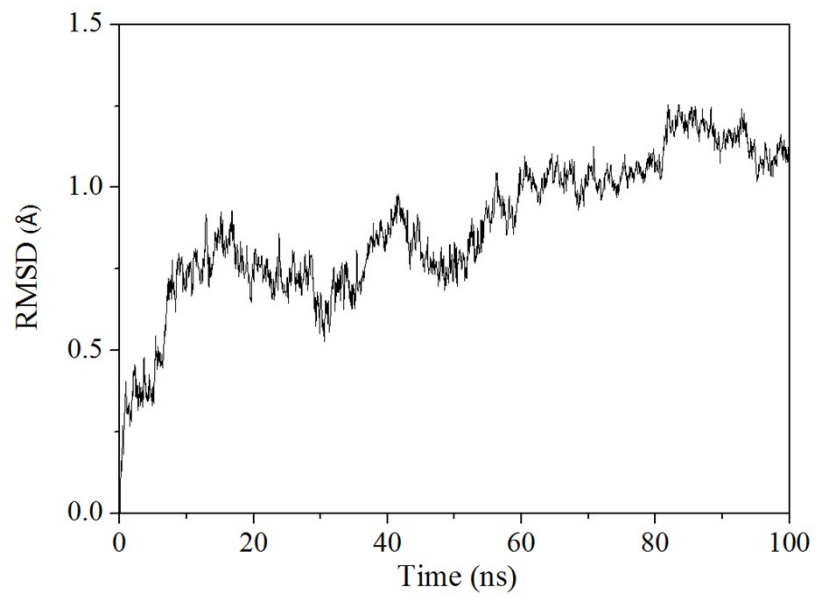

**Fig. S1** RMSD values of BMP-7 backbone during 100ns dynamic simulation.

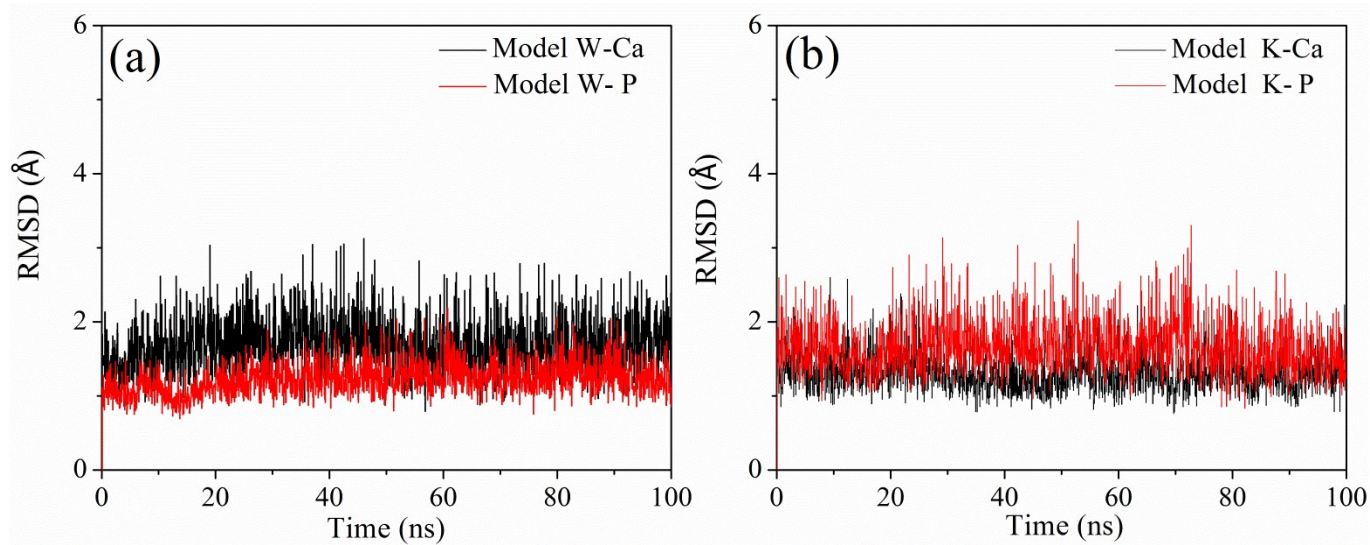

**Fig. S2** RMSD values of BMP-7 backbone in four target models. (a) Model **W-Ca** and **W-P**, (b) Model **K-Ca** and **K-P**.

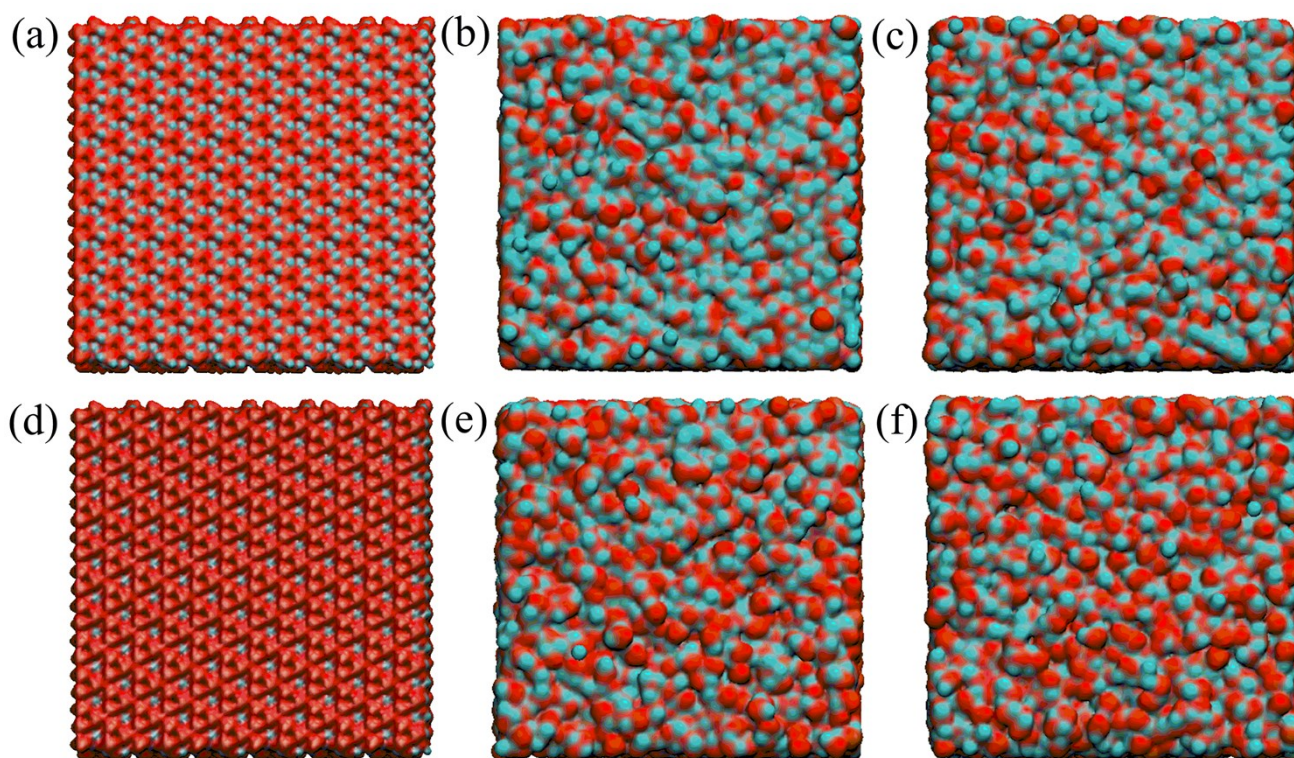

**Fig. S3** Top view of  $\beta$ -TCP (001) Ca-rich and P-rich surfaces by VMD quicksurf module. Surfaces before molecular dynamics (a) Ca-rich initial surface, (d) P-rich initial surface. Surfaces after molecular dynamics: (b) Model **W-Ca**, (c) Model **K-Ca**, (e) Model **W-P**, and (f) Model **K-P**. Color codes:  $\text{Ca}^{2+}$ , cyan;  $\text{PO}_4^{3-}$ , red.

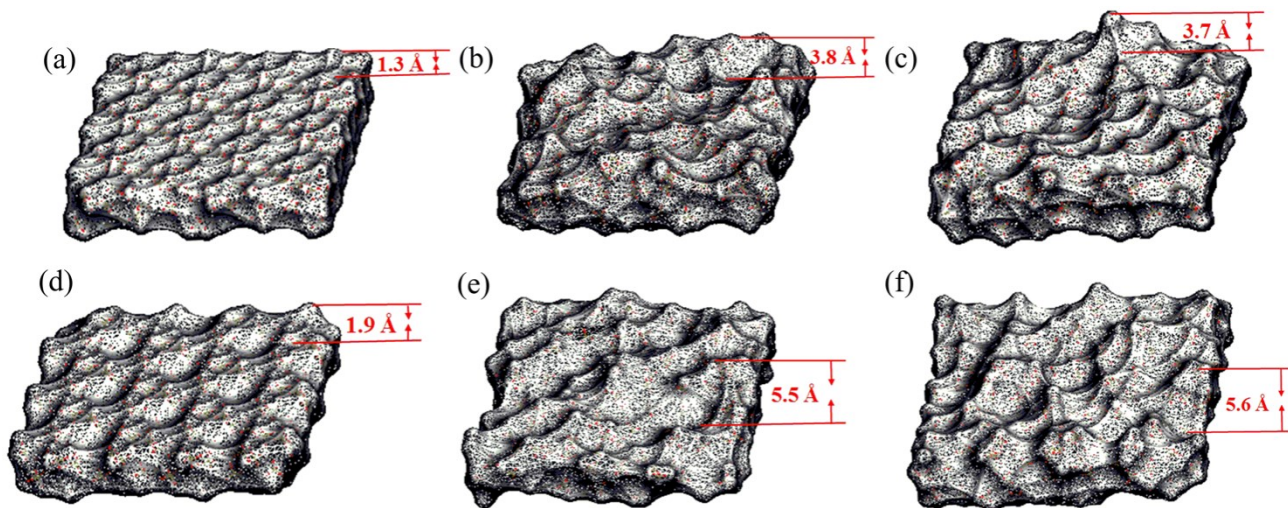

**Fig. S4** Morphology of the  $\beta$ -TCP surfaces in the four target models. (a) and (b) show the grooves on the Ca-rich and P-rich surfaces before MD, respectively. (b)(c)(e)(f) are surfaces after MD: (b) Model **W-Ca**, (c) Model **K-Ca**, (e) Model **W-P**, and (f) Model **K-P**.



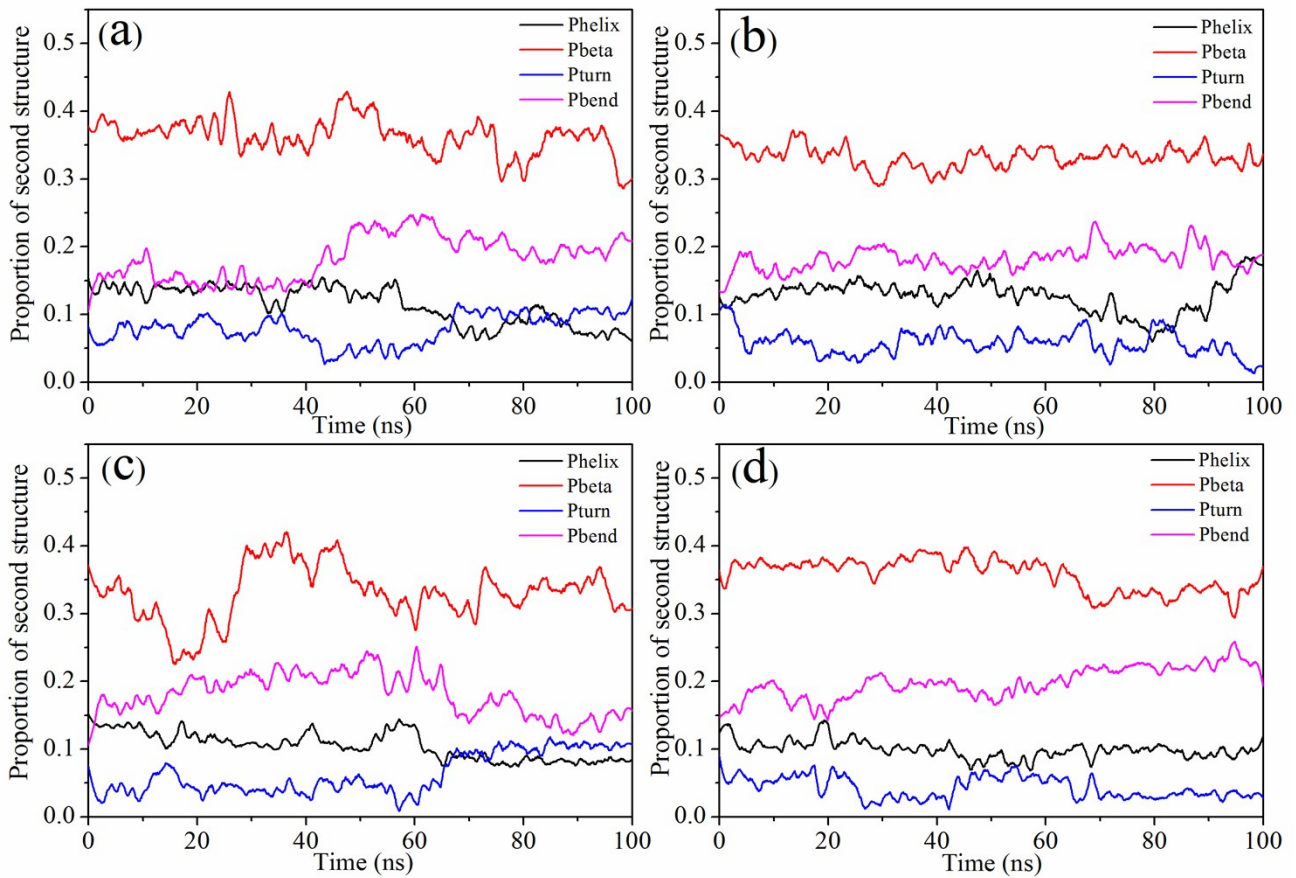

**Fig. S5** The proportion of second structure for BMP-7 during the MD simulation. (a) Model **W-Ca**, (b) Model **K-Ca**, (c) Model **W-P**, and (d) Model **K-P**.

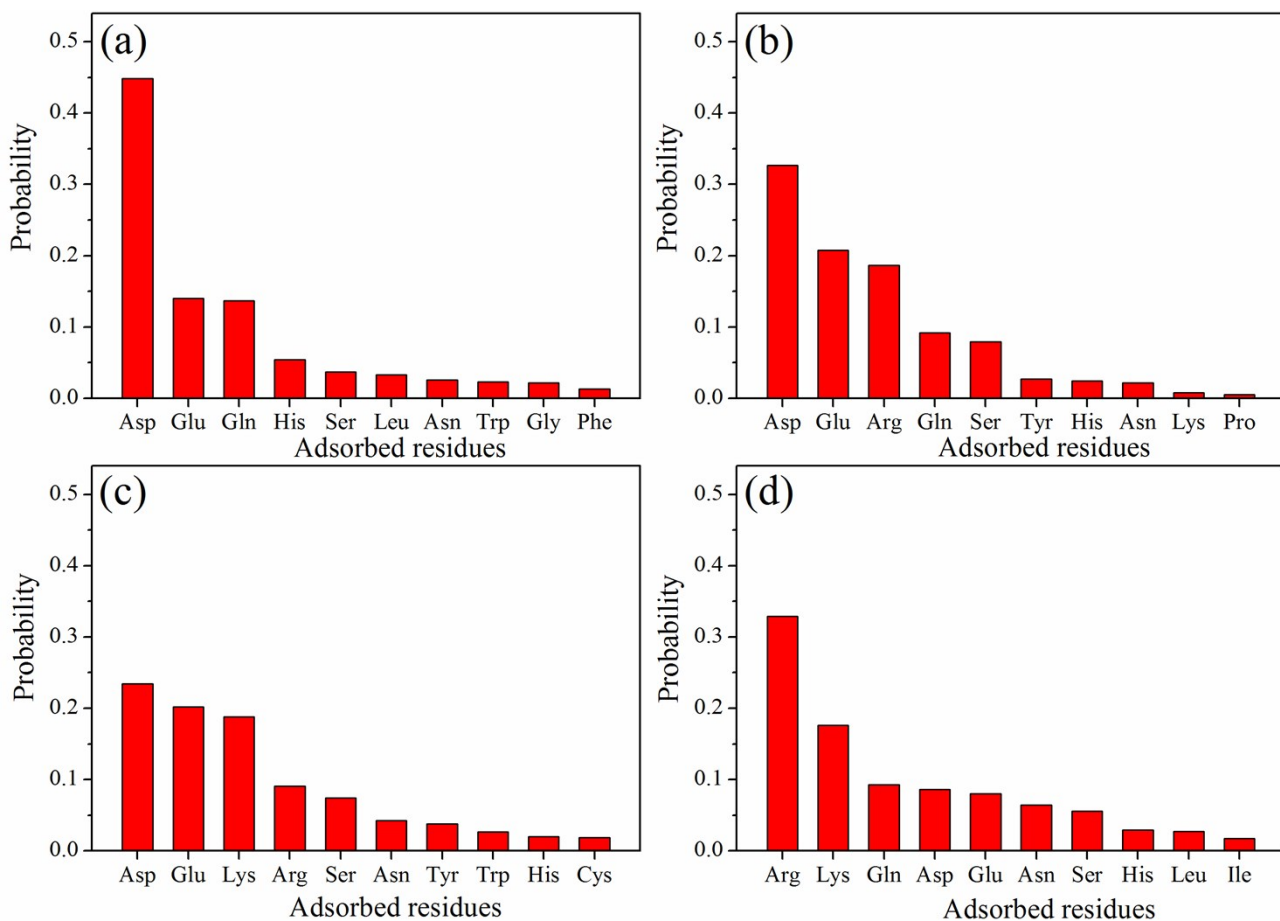

**Fig. S6** Proportion of adsorbed residues of BMP-7 on the  $\beta$ -TCP surfaces. (a) Model **W-Ca**, (b) Model **K-Ca**, (c) Model **W-P**, and (d) Model **K-P**.

**Table S1** The total number of atoms in BMP-7,  $\beta$ -TCP, water and ions ( $\text{Na}^+$  and  $\text{Cl}^-$ ) for each model in the dynamic simulations

| Models      | BMP-7 | $\beta$ -TCP | Water  | Ions<br>( $\text{Na}^+$ and $\text{Cl}^-$ ) |
|-------------|-------|--------------|--------|---------------------------------------------|
| <b>W-Ca</b> | 1741  | 22880        | 110802 | 148                                         |
| <b>K-Ca</b> | 1741  | 22880        | 110856 | 148                                         |
| <b>W-P</b>  | 1741  | 21840        | 111018 | 148                                         |
| <b>K-P</b>  | 1741  | 21840        | 110889 | 148                                         |



**Table S2** Ten models with the lowest scoring energy among the 1000 docking structures on  $\beta$ -TCP (001) Ca-rich surface

| Docking Structures     | Scoring Energy |        |
|------------------------|----------------|--------|
| Model <b>Ws-Ca</b>     | 1              | -161.2 |
|                        | 2              | -155.6 |
|                        | 3              | -155.5 |
|                        | 4              | -155.0 |
|                        | 5              | -154.4 |
|                        | 6              | -153.6 |
| Model <b>Ks-Ca</b>     | 1              | -156.2 |
|                        | 2              | -155.8 |
| Model <b>Others-Ca</b> | 1              | -158.1 |
|                        | 2              | -157.2 |

**Table S3** Ten models with the lowest scoring energy among the 1000 docking structures on  $\beta$ -TCP (001) P-rich surface

| <b>Docking Structures</b> | <b>Scoring Energy</b> |
|---------------------------|-----------------------|
| Model <b>Ws-P</b>         | 1 -158.2              |
|                           | 2 -158.1              |
| Model <b>Ks-P</b>         | 1 -158.4              |
|                           | 2 -158.0              |
|                           | 3 -157.8              |
|                           | 4 -157.7              |
|                           | 5 -157.1              |
| Model <b>Others-P</b>     | 1 -165.6              |
|                           | 2 -163.6              |
|                           | 3 -161.7              |

The INTERFACE potential is in the 12-6 Lennard-Jones formula, and the specific function form of IFF is as follows:<sup>1</sup>

$$\begin{aligned}
 E_{total} = & \sum_{bonds} k_{r,ij}(r_{ij} - r_{0,ij})^2 + \sum_{angles} k_{\theta,ijk}(\theta_{ijk} - \theta_{0,ijk})^2 + \sum_{ijnonbonded} \frac{q_i q_j}{4\pi\epsilon_0 r_{ij}} \\
 & + \sum_{ijnonbonded} \epsilon_{ij} \left[ \left( \frac{\sigma_{ij}}{r_{ij}} \right)^{12} - 2 \left( \frac{\sigma_{ij}}{r_{ij}} \right)^6 \right] \quad \dots(1)
 \end{aligned}$$

The interaction strength between BMP-7 and  $\beta$ -TCP surfaces was evaluated by the calculated interaction energies. The formulas for calculating the interaction energy ( $E_{\text{int}}$ ) are as follows:

$$E_{\text{int}} = E_{\text{total}(\beta\text{-TCP+BMP-7})} - E_{\text{total}(\beta\text{-TCP})} - E_{\text{total}(\text{BMP-7})} \quad \dots(2)$$

$$E_{\text{total}} = E_{\text{vdw}} + E_{\text{Coulomb}} \quad \dots(3)$$

$$E_{\text{vdw}}(i,j) = \varepsilon_{ij} \left[ \frac{\sigma_{ij}}{d_{ij}^{12}} - 2 \left( \frac{\sigma_{ij}}{d_{ij}} \right)^6 \right] \quad \dots(4)$$

$$E_{\text{Coulomb}}(i,j) = \frac{C_0 q_i q_j}{\varepsilon d_{ij}} \quad \dots(5)$$

The formula 3 to 5 were referenced from Rosetta.<sup>2,3</sup> In these formulas,  $E_{\text{vdw}}$  and  $E_{\text{Coulomb}}$  represent the energy of Van der Waals and coulomb, respectively.  $E_{\text{total}}$  is the sum energy of Van der Waals and coulomb. The  $E_{\text{total}(\beta\text{-TCP+BMP-7})}$ ,  $E_{\text{total}(\beta\text{-TCP})}$ , and  $E_{\text{total}(\text{BMP-7})}$  represent the intramolecular and intermolecular interactions of the ( $\beta$ -TCP and protein),  $\beta$ -TCP, and BMP-7, respectively. Then we calculated the interaction energy by formula 2.

The force filed parameters we used were as follows:

Lammps Data File:

...

Pair Coeffs

|           |             |                 |             |                 |              |
|-----------|-------------|-----------------|-------------|-----------------|--------------|
| 1         | 0.046       | 0.4000135       | 0.046       | 0.4000135       | # H          |
| 2         | 0.046       | 0.4000135       | 0.046       | 0.4000135       | # HC         |
| 3         | 0.022       | 2.351973        | 0.022       | 2.351973        | # HA         |
| 4         | 0.046       | 0.4000135       | 0.046       | 0.4000135       | # HT         |
| 5         | 0.03        | 2.420037        | 0.03        | 2.420037        | # HP         |
| 6         | 0.022       | 2.351973        | 0.022       | 2.351973        | # HB         |
| 7         | 0.046       | 1.603618        | 0.046       | 1.603618        | # HR1        |
| 8         | 0.0078      | 2.615679        | 0.0078      | 2.615679        | # HR3        |
| 9         | 0.1         | 0.8018088       | 0.1         | 0.8018088       | # HS         |
| 10        | 0.11        | 3.563595        | 0.11        | 3.563595        | # C          |
| 11        | 0.07        | 3.550053        | 0.07        | 3.550053        | # CA         |
| 12        | 0.02        | 4.053589        | 0.01        | 3.385415        | # CT1        |
| 13        | 0.055       | 3.875409        | 0.01        | 3.385415        | # CT2        |
| 14        | 0.08        | 3.670503        | 0.01        | 3.385415        | # CT3        |
| 15        | 0.05        | 3.207235        | 0.05        | 3.207235        | # CPH1       |
| 16        | 0.05        | 3.207235        | 0.05        | 3.207235        | # CPH2       |
| 17        | 0.09        | 3.207235        | 0.09        | 3.385415        | # CPT        |
| 18        | 0.07        | 3.550053        | 0.07        | 3.550053        | # CY         |
| 19        | 0.02        | 4.053589        | 0.01        | 3.385415        | # CP1        |
| 20        | 0.055       | 3.875409        | 0.01        | 3.385415        | # CP2        |
| 21        | 0.055       | 3.875409        | 0.01        | 3.385415        | # CP3        |
| 22        | 0.07        | 3.563595        | 0.07        | 3.563595        | # CC         |
| 23        | 0.2         | 3.296325        | 0.0001      | 3.296325        | # N          |
| 24        | 0.2         | 3.296325        | 0.2         | 3.296325        | # NR1        |
| 25        | 0.2         | 3.296325        | 0.2         | 3.296325        | # NR2        |
| 26        | 0.2         | 3.296325        | 0.2         | 2.761786        | # NH1        |
| 27        | 0.2         | 3.296325        | 0.2         | 3.296325        | # NH2        |
| 28        | 0.2         | 3.296325        | 0.2         | 3.296325        | # NH3        |
| 29        | 0.2         | 3.296325        | 0.2         | 3.296325        | # NC2        |
| 30        | 0.2         | 3.296325        | 0.2         | 3.296325        | # NY         |
| 31        | 0.12        | 3.029056        | 0.12        | 2.494516        | # O          |
| 32        | 0.12        | 3.029056        | 0.12        | 3.029056        | # OC         |
| 33        | 0.1521      | 3.153781        | 0.1521      | 3.153781        | # OH1        |
| 34        | 0.1521      | 3.150574        | 0.1521      | 3.150574        | # OT         |
| 35        | 0.45        | 3.563595        | 0.45        | 3.563595        | # S          |
| <b>36</b> | <b>0.28</b> | <b>4.300000</b> | <b>0.28</b> | <b>4.300000</b> | <b># P8</b>  |
| <b>37</b> | <b>0.07</b> | <b>3.400000</b> | <b>0.07</b> | <b>3.400000</b> | <b># OP8</b> |
| <b>38</b> | <b>0.13</b> | <b>3.300000</b> | <b>0.13</b> | <b>3.300000</b> | <b># CA8</b> |

|    |        |          |        |          |      |
|----|--------|----------|--------|----------|------|
| 39 | 0.15   | 4.04468  | 0.15   | 4.04468  | # CL |
| 40 | 0.0469 | 2.429926 | 0.0469 | 2.429926 | # NA |

...

Bond Coeffs

|    |        |       |        |      |
|----|--------|-------|--------|------|
| 1  | 250    | 1.49  | # C    | CP1  |
| 2  | 250    | 1.49  | # C    | CT1  |
| 3  | 250    | 1.49  | # C    | CT2  |
| 4  | 260    | 1.3   | # C    | N    |
| 5  | 463    | 1.365 | # C    | NC2  |
| 6  | 370    | 1.345 | # C    | NH1  |
| 7  | 620    | 1.23  | # C    | O    |
| 8  | 305    | 1.375 | # CA   | CA   |
| 9  | 305    | 1.368 | # CA   | CPT  |
| 10 | 230    | 1.49  | # CA   | CT2  |
| 11 | 350    | 1.365 | # CA   | CY   |
| 12 | 340    | 1.08  | # CA   | HP   |
| 13 | 270    | 1.37  | # CA   | NY   |
| 14 | 334.3  | 1.411 | # CA   | OH1  |
| 15 | 200    | 1.522 | # CC   | CT1  |
| 16 | 200    | 1.522 | # CC   | CT2  |
| 17 | 430    | 1.36  | # CC   | NH2  |
| 18 | 650    | 1.23  | # CC   | O    |
| 19 | 525    | 1.26  | # CC   | OC   |
| 20 | 222.5  | 1.527 | # CP1  | CP2  |
| 21 | 330    | 1.08  | # CP1  | HB   |
| 22 | 320    | 1.434 | # CP1  | N    |
| 23 | 222.5  | 1.537 | # CP2  | CP2  |
| 24 | 222.5  | 1.537 | # CP2  | CP3  |
| 25 | 309    | 1.111 | # CP2  | HA   |
| 26 | 309    | 1.111 | # CP3  | HA   |
| 27 | 320    | 1.455 | # CP3  | N    |
| 28 | 410    | 1.36  | # CPH1 | CPH1 |
| 29 | 229.63 | 1.5   | # CPH1 | CT2  |
| 30 | 365    | 1.083 | # CPH1 | HR3  |
| 31 | 400    | 1.38  | # CPH1 | NR1  |
| 32 | 400    | 1.38  | # CPH1 | NR2  |
| 33 | 340    | 1.09  | # CPH2 | HR1  |
| 34 | 400    | 1.36  | # CPH2 | NR1  |
| 35 | 400    | 1.32  | # CPH2 | NR2  |
| 36 | 360    | 1.4   | # CPT  | CPT  |
| 37 | 350    | 1.44  | # CPT  | CY   |
| 38 | 270    | 1.375 | # CPT  | NY   |
| 39 | 222.5  | 1.5   | # CT1  | CT1  |



|           |            |             |              |           |
|-----------|------------|-------------|--------------|-----------|
| 40        | 222.5      | 1.538       | # CT1        | CT2       |
| 41        | 222.5      | 1.538       | # CT1        | CT3       |
| 42        | 309        | 1.111       | # CT1        | HA        |
| 43        | 330        | 1.08        | # CT1        | HB        |
| 44        | 320        | 1.43        | # CT1        | NH1       |
| 45        | 200        | 1.48        | # CT1        | NH3       |
| 46        | 428        | 1.42        | # CT1        | OH1       |
| 47        | 222.5      | 1.53        | # CT2        | CT2       |
| 48        | 222.5      | 1.528       | # CT2        | CT3       |
| 49        | 230        | 1.51        | # CT2        | CY        |
| 50        | 309        | 1.111       | # CT2        | HA        |
| 51        | 330        | 1.08        | # CT2        | HB        |
| 52        | 261        | 1.49        | # CT2        | NC2       |
| 53        | 320        | 1.43        | # CT2        | NH1       |
| 54        | 200        | 1.48        | # CT2        | NH3       |
| 55        | 428        | 1.42        | # CT2        | OH1       |
| 56        | 198        | 1.818       | # CT2        | S         |
| 57        | 322        | 1.111       | # CT3        | HA        |
| 58        | 240        | 1.816       | # CT3        | S         |
| 59        | 440        | 0.997       | # H          | NH1       |
| 60        | 480        | 1           | # H          | NH2       |
| 61        | 466        | 1           | # H          | NR1       |
| 62        | 465        | 0.976       | # H          | NY        |
| 63        | 545        | 0.96        | # H          | OH1       |
| 64        | 455        | 1           | # HC         | NC2       |
| 65        | 403        | 1.04        | # HC         | NH3       |
| 66        | 275        | 1.325       | # HS         | S         |
| 67        | 412.2848   | 1           | # HT         | OT        |
| <b>68</b> | <b>430</b> | <b>1.57</b> | <b># OP8</b> | <b>P8</b> |

...

Angle Coeffs

|    |      |       |   |   |     |     |     |
|----|------|-------|---|---|-----|-----|-----|
| 1  | 52   | 112.3 | 0 | 0 | # C | CP1 | CP2 |
| 2  | 50   | 112   | 0 | 0 | # C | CP1 | HB  |
| 3  | 50   | 108.2 | 0 | 0 | # C | CP1 | N   |
| 4  | 52   | 108   | 0 | 0 | # C | CT1 | CT1 |
| 5  | 52   | 108   | 0 | 0 | # C | CT1 | CT2 |
| 6  | 52   | 108   | 0 | 0 | # C | CT1 | CT3 |
| 7  | 50   | 109.5 | 0 | 0 | # C | CT1 | HB  |
| 8  | 50   | 107   | 0 | 0 | # C | CT1 | NH1 |
| 9  | 43.7 | 110   | 0 | 0 | # C | CT1 | NH3 |
| 10 | 50   | 109.5 | 0 | 0 | # C | CT2 | HB  |
| 11 | 50   | 107   | 0 | 0 | # C | CT2 | NH1 |
| 12 | 60   | 117   | 0 | 0 | # C | N   | CP1 |

|    |       |       |       |        |        |      |     |
|----|-------|-------|-------|--------|--------|------|-----|
| 13 | 60    | 117   | 0     | 0      | # C    | N    | CP3 |
| 14 | 62.3  | 120   | 0     | 0      | # C    | NC2  | CT2 |
| 15 | 49    | 120   | 0     | 0      | # C    | NC2  | HC  |
| 16 | 50    | 120   | 0     | 0      | # C    | NH1  | CT1 |
| 17 | 50    | 120   | 0     | 0      | # C    | NH1  | CT2 |
| 18 | 34    | 123   | 0     | 0      | # C    | NH1  | H   |
| 19 | 40    | 120   | 35    | 2.4162 | # CA   | CA   | CA  |
| 20 | 60    | 118   | 0     | 0      | # CA   | CA   | CPT |
| 21 | 45.8  | 122.3 | 0     | 0      | # CA   | CA   | CT2 |
| 22 | 30    | 120   | 22    | 2.1525 | # CA   | CA   | HP  |
| 23 | 45.2  | 120   | 0     | 0      | # CA   | CA   | OH1 |
| 24 | 60    | 122   | 0     | 0      | # CA   | CPT  | CPT |
| 25 | 160   | 130.6 | 0     | 0      | # CA   | CPT  | CY  |
| 26 | 160   | 130.6 | 0     | 0      | # CA   | CPT  | NY  |
| 27 | 51.8  | 107.5 | 0     | 0      | # CA   | CT2  | CT1 |
| 28 | 49.3  | 107.5 | 0     | 0      | # CA   | CT2  | HA  |
| 29 | 120   | 107.4 | 25    | 2.261  | # CA   | CY   | CPT |
| 30 | 45.8  | 129.4 | 0     | 0      | # CA   | CY   | CT2 |
| 31 | 110   | 108   | 0     | 0      | # CA   | NY   | CPT |
| 32 | 28    | 126   | 0     | 0      | # CA   | NY   | H   |
| 33 | 65    | 108   | 0     | 0      | # CA   | OH1  | H   |
| 34 | 52    | 108   | 0     | 0      | # CC   | CT1  | CT2 |
| 35 | 50    | 109.5 | 0     | 0      | # CC   | CT1  | HB  |
| 36 | 50    | 107   | 0     | 0      | # CC   | CT1  | NH1 |
| 37 | 52    | 108   | 0     | 0      | # CC   | CT2  | CT1 |
| 38 | 52    | 108   | 0     | 0      | # CC   | CT2  | CT2 |
| 39 | 33    | 109.5 | 30    | 2.163  | # CC   | CT2  | HA  |
| 40 | 50    | 120   | 0     | 0      | # CC   | NH2  | H   |
| 41 | 80    | 116.5 | 0     | 0      | # CP1  | C    | NH1 |
| 42 | 80    | 118   | 0     | 0      | # CP1  | C    | O   |
| 43 | 70    | 108.5 | 0     | 0      | # CP1  | CP2  | CP2 |
| 44 | 33.43 | 110.1 | 22.53 | 2.179  | # CP1  | CP2  | HA  |
| 45 | 100   | 114.2 | 0     | 0      | # CP1  | N    | CP3 |
| 46 | 35    | 118   | 0     | 0      | # CP2  | CP1  | HB  |
| 47 | 70    | 110.8 | 0     | 0      | # CP2  | CP1  | N   |
| 48 | 70    | 108.5 | 0     | 0      | # CP2  | CP2  | CP3 |
| 49 | 26.5  | 110.1 | 22.53 | 2.179  | # CP2  | CP2  | HA  |
| 50 | 26.5  | 110.1 | 22.53 | 2.179  | # CP2  | CP3  | HA  |
| 51 | 70    | 110.5 | 0     | 0      | # CP2  | CP3  | N   |
| 52 | 26.5  | 110.1 | 22.53 | 2.179  | # CP3  | CP2  | HA  |
| 53 | 45.8  | 130   | 0     | 0      | # CPH1 | CPH1 | CT2 |
| 54 | 25    | 130   | 20    | 2.2    | # CPH1 | CPH1 | HR3 |
| 55 | 130   | 106   | 0     | 0      | # CPH1 | CPH1 | NR1 |
| 56 | 130   | 110   | 0     | 0      | # CPH1 | CPH1 | NR2 |

|     |       |       |       |       |                 |
|-----|-------|-------|-------|-------|-----------------|
| 57  | 58.35 | 113   | 0     | 0     | # CPH1 CT2 CT1  |
| 58  | 33.43 | 109.5 | 0     | 0     | # CPH1 CT2 HA   |
| 59  | 130   | 107.5 | 0     | 0     | # CPH1 NR1 CPH2 |
| 60  | 30    | 125.5 | 20    | 2.15  | # CPH1 NR1 H    |
| 61  | 130   | 104   | 0     | 0     | # CPH1 NR2 CPH2 |
| 62  | 30    | 127   | 20    | 2.14  | # CPH2 NR1 H    |
| 63  | 30    | 122   | 22    | 2.146 | # CPT CA HP     |
| 64  | 110   | 107.4 | 0     | 0     | # CPT CPT CY    |
| 65  | 110   | 107.4 | 0     | 0     | # CPT CPT NY    |
| 66  | 45.8  | 124   | 0     | 0     | # CPT CY CT2    |
| 67  | 28    | 126   | 0     | 0     | # CPT NY H      |
| 68  | 20    | 112.5 | 0     | 0     | # CT1 C N       |
| 69  | 80    | 116.5 | 0     | 0     | # CT1 C NH1     |
| 70  | 80    | 121   | 0     | 0     | # CT1 C O       |
| 71  | 40    | 118   | 50    | 2.388 | # CT1 CC OC     |
| 72  | 53.35 | 111   | 8     | 2.561 | # CT1 CT1 CT2   |
| 73  | 53.35 | 108.5 | 8     | 2.561 | # CT1 CT1 CT3   |
| 74  | 34.5  | 110.1 | 22.53 | 2.179 | # CT1 CT1 HA    |
| 75  | 35    | 111   | 0     | 0     | # CT1 CT1 HB    |
| 76  | 70    | 113.5 | 0     | 0     | # CT1 CT1 NH1   |
| 77  | 75.7  | 110.1 | 0     | 0     | # CT1 CT1 OH1   |
| 78  | 58.35 | 113.5 | 11.16 | 2.561 | # CT1 CT2 CT1   |
| 79  | 58.35 | 113.5 | 11.16 | 2.561 | # CT1 CT2 CT2   |
| 80  | 58.35 | 113.5 | 11.16 | 2.561 | # CT1 CT2 CT3   |
| 81  | 58.35 | 114   | 0     | 0     | # CT1 CT2 CY    |
| 82  | 33.43 | 110.1 | 22.53 | 2.179 | # CT1 CT2 HA    |
| 83  | 75.7  | 110.1 | 0     | 0     | # CT1 CT2 OH1   |
| 84  | 58    | 112.5 | 0     | 0     | # CT1 CT2 S     |
| 85  | 33.43 | 110.1 | 22.53 | 2.179 | # CT1 CT3 HA    |
| 86  | 35    | 117   | 0     | 0     | # CT1 NH1 H     |
| 87  | 30    | 109.5 | 20    | 2.074 | # CT1 NH3 HC    |
| 88  | 57.5  | 106   | 0     | 0     | # CT1 OH1 H     |
| 89  | 80    | 116.5 | 0     | 0     | # CT2 C NH1     |
| 90  | 80    | 121   | 0     | 0     | # CT2 C O       |
| 91  | 50    | 116.5 | 50    | 2.45  | # CT2 CC NH2    |
| 92  | 15    | 121   | 50    | 2.44  | # CT2 CC O      |
| 93  | 40    | 118   | 50    | 2.388 | # CT2 CC OC     |
| 94  | 45.8  | 120   | 0     | 0     | # CT2 CPH1 NR2  |
| 95  | 53.35 | 114   | 8     | 2.561 | # CT2 CT1 CT3   |
| 96  | 34.5  | 110.1 | 22.53 | 2.179 | # CT2 CT1 HA    |
| 97  | 35    | 111   | 0     | 0     | # CT2 CT1 HB    |
| 98  | 70    | 113.5 | 0     | 0     | # CT2 CT1 NH1   |
| 99  | 67.7  | 110   | 0     | 0     | # CT2 CT1 NH3   |
| 100 | 58.35 | 113.6 | 11.16 | 2.561 | # CT2 CT2 CT2   |

|     |       |        |       |       |       |      |     |
|-----|-------|--------|-------|-------|-------|------|-----|
| 101 | 26.5  | 110.1  | 22.53 | 2.179 | # CT2 | CT2  | HA  |
| 102 | 67.7  | 107.5  | 0     | 0     | # CT2 | CT2  | NC2 |
| 103 | 67.7  | 110    | 0     | 0     | # CT2 | CT2  | NH3 |
| 104 | 58    | 114.5  | 0     | 0     | # CT2 | CT2  | S   |
| 105 | 34.6  | 110.1  | 22.53 | 2.179 | # CT2 | CT3  | HA  |
| 106 | 40.4  | 120    | 0     | 0     | # CT2 | NC2  | HC  |
| 107 | 35    | 117    | 0     | 0     | # CT2 | NH1  | H   |
| 108 | 30    | 109.5  | 20    | 2.074 | # CT2 | NH3  | HC  |
| 109 | 57.5  | 106    | 0     | 0     | # CT2 | OH1  | H   |
| 110 | 34    | 95     | 0     | 0     | # CT2 | S    | CT3 |
| 111 | 38.8  | 95     | 0     | 0     | # CT2 | S    | HS  |
| 112 | 53.35 | 114    | 8     | 2.561 | # CT3 | CT1  | CT3 |
| 113 | 34.5  | 110.1  | 22.53 | 2.179 | # CT3 | CT1  | HA  |
| 114 | 35    | 111    | 0     | 0     | # CT3 | CT1  | HB  |
| 115 | 70    | 113.5  | 0     | 0     | # CT3 | CT1  | NH1 |
| 116 | 75.7  | 110.1  | 0     | 0     | # CT3 | CT1  | OH1 |
| 117 | 34.6  | 110.1  | 22.53 | 2.179 | # CT3 | CT2  | HA  |
| 118 | 32    | 125    | 25    | 2.173 | # CY  | CA   | HP  |
| 119 | 120   | 110    | 25    | 2.24  | # CY  | CA   | NY  |
| 120 | 33.43 | 109.5  | 0     | 0     | # CY  | CT2  | HA  |
| 121 | 23    | 120    | 0     | 0     | # H   | NH2  | H   |
| 122 | 35.5  | 109    | 5.4   | 1.802 | # HA  | CP2  | HA  |
| 123 | 35.5  | 109    | 5.4   | 1.802 | # HA  | CP3  | HA  |
| 124 | 48    | 108    | 0     | 0     | # HA  | CP3  | N   |
| 125 | 45.9  | 108.89 | 0     | 0     | # HA  | CT1  | OH1 |
| 126 | 35.5  | 109    | 5.4   | 1.802 | # HA  | CT2  | HA  |
| 127 | 51.5  | 107.5  | 0     | 0     | # HA  | CT2  | NC2 |
| 128 | 45    | 107.5  | 35    | 2.101 | # HA  | CT2  | NH3 |
| 129 | 45.9  | 108.89 | 0     | 0     | # HA  | CT2  | OH1 |
| 130 | 46.1  | 111.3  | 0     | 0     | # HA  | CT2  | S   |
| 131 | 35.5  | 108.4  | 5.4   | 1.802 | # HA  | CT3  | HA  |
| 132 | 46.1  | 111.3  | 0     | 0     | # HA  | CT3  | S   |
| 133 | 48    | 112    | 0     | 0     | # HB  | CP1  | N   |
| 134 | 48    | 108    | 0     | 0     | # HB  | CT1  | NH1 |
| 135 | 51.5  | 107.5  | 0     | 0     | # HB  | CT1  | NH3 |
| 136 | 36    | 115    | 0     | 0     | # HB  | CT2  | HB  |
| 137 | 48    | 108    | 0     | 0     | # HB  | CT2  | NH1 |
| 138 | 25    | 120    | 0     | 0     | # HC  | NC2  | HC  |
| 139 | 44    | 109.5  | 0     | 0     | # HC  | NH3  | HC  |
| 140 | 32    | 125    | 25    | 2.177 | # HP  | CA   | NY  |
| 141 | 25    | 122.5  | 20    | 2.14  | # HR1 | CPH2 | NR1 |
| 142 | 25    | 125    | 20    | 2.12  | # HR1 | CPH2 | NR2 |
| 143 | 25    | 124    | 20    | 2.14  | # HR3 | CPH1 | NR1 |
| 144 | 45.94 | 109.47 | 0     | 0     | # HT  | OT   | HT  |

|            |            |               |          |          |              |           |            |
|------------|------------|---------------|----------|----------|--------------|-----------|------------|
| 145        | 80         | 122.5         | 0        | 0        | # N          | C         | O          |
| 146        | 52         | 120           | 90       | 2.3642   | # NC2        | C         | NC2        |
| 147        | 80         | 122.5         | 0        | 0        | # NH1        | C         | O          |
| 148        | 75         | 122.5         | 50       | 2.37     | # NH2        | CC        | O          |
| 149        | 130        | 112.5         | 0        | 0        | # NR1        | CPH2      | NR2        |
| 150        | 100        | 124           | 70       | 2.225    | # OC         | CC        | OC         |
| <b>151</b> | <b>125</b> | <b>109.47</b> | <b>0</b> | <b>0</b> | <b># OP8</b> | <b>P8</b> | <b>OP8</b> |

...

Dihedral Coeffs

|    |      |   |     |   |     |     |     |      |
|----|------|---|-----|---|-----|-----|-----|------|
| 1  | 0.14 | 3 | 0   | 1 | # C | CP1 | CP2 | CP2  |
| 2  | 0.14 | 3 | 0   | 1 | # C | CP1 | CP2 | HA   |
| 3  | 0.8  | 3 | 0   | 1 | # C | CP1 | N   | C    |
| 4  | 0.1  | 3 | 0   | 1 | # C | CP1 | N   | CP3  |
| 5  | 0.2  | 3 | 0   | 1 | # C | CT1 | CT1 | CT2  |
| 6  | 0.2  | 3 | 0   | 1 | # C | CT1 | CT1 | CT3  |
| 7  | 0.2  | 3 | 0   | 1 | # C | CT1 | CT1 | HA   |
| 8  | 0.2  | 3 | 0   | 1 | # C | CT1 | CT1 | OH1  |
| 9  | 0.04 | 3 | 0   | 1 | # C | CT1 | CT2 | CA   |
| 10 | 0.2  | 3 | 0   | 1 | # C | CT1 | CT2 | CC   |
| 11 | 0.2  | 3 | 0   | 1 | # C | CT1 | CT2 | CPH1 |
| 12 | 0.2  | 3 | 0   | 1 | # C | CT1 | CT2 | CT1  |
| 13 | 0.2  | 3 | 0   | 1 | # C | CT1 | CT2 | CT2  |
| 14 | 0.2  | 3 | 0   | 1 | # C | CT1 | CT2 | CY   |
| 15 | 0.2  | 3 | 0   | 1 | # C | CT1 | CT2 | HA   |
| 16 | 0.2  | 3 | 0   | 1 | # C | CT1 | CT2 | OH1  |
| 17 | 0.2  | 3 | 0   | 1 | # C | CT1 | CT2 | S    |
| 18 | 0.2  | 3 | 0   | 1 | # C | CT1 | CT3 | HA   |
| 19 | 0.2  | 1 | 180 | 1 | # C | CT1 | NH1 | C    |
| 20 | 0    | 1 | 0   | 1 | # C | CT1 | NH1 | H    |
| 21 | 0.1  | 3 | 0   | 1 | # C | CT1 | NH3 | HC   |
| 22 | 0.2  | 1 | 180 | 1 | # C | CT2 | NH1 | C    |
| 23 | 0    | 1 | 0   | 1 | # C | CT2 | NH1 | H    |
| 24 | 0.8  | 3 | 0   | 1 | # C | N   | CP1 | CP2  |
| 25 | 0.8  | 3 | 0   | 1 | # C | N   | CP1 | HB   |
| 26 | 0    | 3 | 180 | 1 | # C | N   | CP3 | CP2  |
| 27 | 0    | 3 | 180 | 1 | # C | N   | CP3 | HA   |
| 28 | 0    | 6 | 180 | 1 | # C | NC2 | CT2 | CT2  |
| 29 | 0    | 6 | 180 | 1 | # C | NC2 | CT2 | HA   |
| 30 | 0.2  | 1 | 180 | 1 | # C | NH1 | CT1 | CC   |
| 31 | 1.8  | 1 | 0   | 1 | # C | NH1 | CT1 | CT1  |
| 32 | 1.8  | 1 | 0   | 1 | # C | NH1 | CT1 | CT2  |
| 33 | 1.8  | 1 | 0   | 1 | # C | NH1 | CT1 | CT3  |
| 34 | 0    | 1 | 0   | 1 | # C | NH1 | CT1 | HB   |

|    |       |   |     |     |       |     |     |      |
|----|-------|---|-----|-----|-------|-----|-----|------|
| 35 | 0     | 1 | 0   | 1   | # C   | NH1 | CT2 | HB   |
| 36 | 3.1   | 2 | 180 | 0.5 | # CA  | CA  | CA  | CA   |
| 37 | 3.1   | 2 | 180 | 0.5 | # CA  | CA  | CA  | CPT  |
| 38 | 3.1   | 2 | 180 | 1   | # CA  | CA  | CA  | CT2  |
| 39 | 4.2   | 2 | 180 | 1   | # CA  | CA  | CA  | HP   |
| 40 | 3.1   | 2 | 180 | 1   | # CA  | CA  | CA  | OH1  |
| 41 | 3.1   | 2 | 180 | 0.5 | # CA  | CA  | CPT | CPT  |
| 42 | 3     | 2 | 180 | 1   | # CA  | CA  | CPT | CY   |
| 43 | 2.8   | 2 | 180 | 1   | # CA  | CA  | CPT | NY   |
| 44 | 0.23  | 2 | 180 | 1   | # CA  | CA  | CT2 | CT1  |
| 45 | 0     | 6 | 0   | 1   | # CA  | CA  | CT2 | HA   |
| 46 | 0.99  | 2 | 180 | 1   | # CA  | CA  | OH1 | H    |
| 47 | 3.1   | 2 | 180 | 0.5 | # CA  | CPT | CPT | CA   |
| 48 | 10    | 2 | 180 | 1   | # CA  | CPT | CPT | CY   |
| 49 | 10    | 3 | 180 | 1   | # CA  | CPT | CPT | NY   |
| 50 | 3     | 3 | 180 | 1   | # CA  | CPT | CY  | CA   |
| 51 | 3     | 3 | 180 | 1   | # CA  | CPT | CY  | CT2  |
| 52 | 3     | 3 | 180 | 1   | # CA  | CPT | NY  | CA   |
| 53 | 0.8   | 3 | 180 | 1   | # CA  | CPT | NY  | H    |
| 54 | 0.2   | 3 | 0   | 1   | # CA  | CT2 | CT1 | HB   |
| 55 | 0.2   | 3 | 0   | 1   | # CA  | CT2 | CT1 | NH1  |
| 56 | 4     | 3 | 180 | 0   | # CA  | CY  | CPT | CPT  |
| 57 | 0.23  | 3 | 180 | 1   | # CA  | CY  | CT2 | CT1  |
| 58 | 0.25  | 3 | 180 | 1   | # CA  | CY  | CT2 | HA   |
| 59 | 5     | 3 | 180 | 0   | # CA  | NY  | CPT | CPT  |
| 60 | 0.2   | 3 | 0   | 1   | # CC  | CT1 | CT2 | CPH1 |
| 61 | 0.2   | 3 | 0   | 1   | # CC  | CT1 | CT2 | HA   |
| 62 | 0     | 3 | 0   | 1   | # CC  | CT1 | NH1 | H    |
| 63 | 0.2   | 3 | 0   | 1   | # CC  | CT2 | CT1 | HB   |
| 64 | 0.2   | 3 | 0   | 1   | # CC  | CT2 | CT1 | NH1  |
| 65 | 0.195 | 3 | 0   | 1   | # CC  | CT2 | CT2 | CT1  |
| 66 | 0.195 | 3 | 0   | 1   | # CC  | CT2 | CT2 | HA   |
| 67 | 1.6   | 1 | 0   | 1   | # CP1 | C   | NH1 | CT1  |
| 68 | 2.5   | 1 | 180 | 0   | # CP1 | C   | NH1 | CT1  |
| 69 | 2.5   | 3 | 180 | 1   | # CP1 | C   | NH1 | H    |
| 70 | 0.16  | 1 | 0   | 0   | # CP1 | CP2 | CP2 | CP3  |
| 71 | 0.16  | 1 | 0   | 1   | # CP1 | CP2 | CP2 | HA   |
| 72 | 2.75  | 3 | 180 | 1   | # CP1 | N   | C   | CT1  |
| 73 | 0.3   | 3 | 0   | 0   | # CP1 | N   | C   | CT1  |
| 74 | 2.75  | 3 | 180 | 1   | # CP1 | N   | C   | O    |
| 75 | 0.3   | 3 | 0   | 0   | # CP1 | N   | C   | O    |
| 76 | 0.1   | 6 | 0   | 0   | # CP1 | N   | CP3 | CP2  |
| 77 | 0.1   | 6 | 0   | 1   | # CP1 | N   | CP3 | HA   |
| 78 | 0.4   | 1 | 0   | 1   | # CP2 | CP1 | C   | NH1  |



|     |      |   |     |   |        |      |      |      |
|-----|------|---|-----|---|--------|------|------|------|
| 79  | 0.6  | 1 | 0   | 0 | # CP2  | CP1  | C    | NH1  |
| 80  | 0.4  | 1 | 180 | 1 | # CP2  | CP1  | C    | O    |
| 81  | 0.6  | 1 | 0   | 0 | # CP2  | CP1  | C    | O    |
| 82  | 0.1  | 1 | 0   | 0 | # CP2  | CP1  | N    | CP3  |
| 83  | 0.14 | 1 | 0   | 1 | # CP2  | CP2  | CP1  | HB   |
| 84  | 0.14 | 2 | 0   | 0 | # CP2  | CP2  | CP1  | N    |
| 85  | 0.14 | 2 | 0   | 1 | # CP2  | CP2  | CP3  | HA   |
| 86  | 0.14 | 2 | 0   | 0 | # CP2  | CP2  | CP3  | N    |
| 87  | 0.16 | 2 | 0   | 1 | # CP3  | CP2  | CP2  | HA   |
| 88  | 2.75 | 2 | 180 | 1 | # CP3  | N    | C    | CT1  |
| 89  | 0.3  | 2 | 0   | 0 | # CP3  | N    | C    | CT1  |
| 90  | 2.75 | 2 | 180 | 1 | # CP3  | N    | C    | O    |
| 91  | 0.3  | 2 | 0   | 0 | # CP3  | N    | C    | O    |
| 92  | 0.1  | 2 | 0   | 1 | # CP3  | N    | CP1  | HB   |
| 93  | 0.2  | 6 | 0   | 1 | # CPH1 | CPH1 | CT2  | CT1  |
| 94  | 0.27 | 2 | 0   | 0 | # CPH1 | CPH1 | CT2  | CT1  |
| 95  | 0    | 2 | 0   | 0 | # CPH1 | CPH1 | CT2  | CT1  |
| 96  | 0    | 2 | 0   | 1 | # CPH1 | CPH1 | CT2  | HA   |
| 97  | 14   | 3 | 180 | 0 | # CPH1 | CPH1 | NR1  | CPH2 |
| 98  | 1    | 3 | 180 | 1 | # CPH1 | CPH1 | NR1  | H    |
| 99  | 14   | 3 | 180 | 0 | # CPH1 | CPH1 | NR2  | CPH2 |
| 100 | 0.2  | 3 | 0   | 1 | # CPH1 | CT2  | CT1  | HB   |
| 101 | 0.2  | 3 | 0   | 1 | # CPH1 | CT2  | CT1  | NH1  |
| 102 | 3    | 3 | 180 | 1 | # CPH1 | NR1  | CPH2 | HR1  |
| 103 | 14   | 3 | 180 | 0 | # CPH1 | NR1  | CPH2 | NR2  |
| 104 | 3    | 3 | 180 | 1 | # CPH1 | NR2  | CPH2 | HR1  |
| 105 | 14   | 3 | 180 | 0 | # CPH1 | NR2  | CPH2 | NR1  |
| 106 | 3    | 3 | 180 | 1 | # CPH2 | NR1  | CPH1 | HR3  |
| 107 | 3    | 3 | 180 | 1 | # CPH2 | NR2  | CPH1 | CT2  |
| 108 | 3    | 3 | 180 | 1 | # CPT  | CA   | CA   | HP   |
| 109 | 3    | 3 | 180 | 1 | # CPT  | CPT  | CA   | HP   |
| 110 | 3    | 3 | 180 | 1 | # CPT  | CPT  | CY   | CT2  |
| 111 | 0.8  | 3 | 180 | 1 | # CPT  | CPT  | NY   | H    |
| 112 | 2    | 3 | 180 | 1 | # CPT  | CY   | CA   | HP   |
| 113 | 4    | 3 | 180 | 0 | # CPT  | CY   | CA   | NY   |
| 114 | 0.23 | 3 | 180 | 1 | # CPT  | CY   | CT2  | CT1  |
| 115 | 0.25 | 1 | 180 | 1 | # CPT  | CY   | CT2  | HA   |
| 116 | 5    | 1 | 180 | 0 | # CPT  | NY   | CA   | CY   |
| 117 | 2    | 3 | 180 | 1 | # CPT  | NY   | CA   | HP   |
| 118 | 1.6  | 1 | 0   | 1 | # CT1  | C    | NH1  | CT1  |
| 119 | 2.5  | 1 | 180 | 0 | # CT1  | C    | NH1  | CT1  |
| 120 | 1.6  | 3 | 0   | 1 | # CT1  | C    | NH1  | CT2  |
| 121 | 2.5  | 3 | 180 | 0 | # CT1  | C    | NH1  | CT2  |
| 122 | 2.5  | 3 | 180 | 1 | # CT1  | C    | NH1  | H    |

|     |       |   |     |   |       |      |      |     |
|-----|-------|---|-----|---|-------|------|------|-----|
| 123 | 0     | 3 | 0   | 1 | # CT1 | CT1  | C    | N   |
| 124 | 0     | 6 | 0   | 1 | # CT1 | CT1  | C    | NH1 |
| 125 | 1.4   | 6 | 0   | 1 | # CT1 | CT1  | C    | O   |
| 126 | 0.2   | 1 | 0   | 1 | # CT1 | CT1  | CT2  | CT3 |
| 127 | 0.2   | 1 | 0   | 1 | # CT1 | CT1  | CT2  | HA  |
| 128 | 0.2   | 1 | 0   | 1 | # CT1 | CT1  | CT3  | HA  |
| 129 | 0     | 1 | 0   | 1 | # CT1 | CT1  | NH1  | H   |
| 130 | 1.33  | 1 | 0   | 1 | # CT1 | CT1  | OH1  | H   |
| 131 | 0.18  | 1 | 0   | 0 | # CT1 | CT1  | OH1  | H   |
| 132 | 0.32  | 2 | 0   | 0 | # CT1 | CT1  | OH1  | H   |
| 133 | 0.05  | 2 | 180 | 1 | # CT1 | CT2  | CC   | NH2 |
| 134 | 0.05  | 2 | 180 | 1 | # CT1 | CT2  | CC   | O   |
| 135 | 0.05  | 2 | 180 | 1 | # CT1 | CT2  | CC   | OC  |
| 136 | 0.19  | 2 | 0   | 1 | # CT1 | CT2  | CPH1 | NR2 |
| 137 | 0.2   | 2 | 0   | 1 | # CT1 | CT2  | CT1  | CT3 |
| 138 | 0.2   | 2 | 0   | 1 | # CT1 | CT2  | CT1  | HA  |
| 139 | 0.2   | 2 | 0   | 1 | # CT1 | CT2  | CT1  | HB  |
| 140 | 0.2   | 2 | 0   | 1 | # CT1 | CT2  | CT1  | NH1 |
| 141 | 0.195 | 6 | 0   | 1 | # CT1 | CT2  | CT2  | CT2 |
| 142 | 0.195 | 2 | 0   | 1 | # CT1 | CT2  | CT2  | HA  |
| 143 | 0.195 | 2 | 0   | 1 | # CT1 | CT2  | CT2  | S   |
| 144 | 0.16  | 2 | 0   | 1 | # CT1 | CT2  | CT3  | HA  |
| 145 | 1.3   | 3 | 0   | 1 | # CT1 | CT2  | OH1  | H   |
| 146 | 0.3   | 3 | 0   | 0 | # CT1 | CT2  | OH1  | H   |
| 147 | 0.42  | 3 | 0   | 0 | # CT1 | CT2  | OH1  | H   |
| 148 | 0.24  | 3 | 0   | 1 | # CT1 | CT2  | S    | HS  |
| 149 | 0.15  | 3 | 0   | 0 | # CT1 | CT2  | S    | HS  |
| 150 | 0.27  | 3 | 0   | 0 | # CT1 | CT2  | S    | HS  |
| 151 | 1.6   | 3 | 0   | 1 | # CT1 | NH1  | C    | CT2 |
| 152 | 2.5   | 3 | 180 | 0 | # CT1 | NH1  | C    | CT2 |
| 153 | 2.5   | 3 | 180 | 1 | # CT1 | NH1  | C    | O   |
| 154 | 2.5   | 3 | 180 | 1 | # CT2 | C    | NH1  | H   |
| 155 | 4.2   | 3 | 180 | 1 | # CT2 | CA   | CA   | HP  |
| 156 | 1.4   | 3 | 180 | 1 | # CT2 | CC   | NH2  | H   |
| 157 | 2     | 3 | 180 | 1 | # CT2 | CPH1 | CPH1 | HR3 |
| 158 | 3     | 3 | 180 | 1 | # CT2 | CPH1 | CPH1 | NR1 |
| 159 | 0     | 3 | 0   | 1 | # CT2 | CT1  | C    | N   |
| 160 | 0     | 3 | 0   | 1 | # CT2 | CT1  | C    | NH1 |
| 161 | 1.4   | 3 | 0   | 1 | # CT2 | CT1  | C    | O   |
| 162 | 0.05  | 3 | 180 | 1 | # CT2 | CT1  | CC   | OC  |
| 163 | 0.2   | 1 | 0   | 1 | # CT2 | CT1  | CT1  | HB  |
| 164 | 0.2   | 1 | 0   | 1 | # CT2 | CT1  | CT1  | NH1 |
| 165 | 0.2   | 3 | 0   | 1 | # CT2 | CT1  | CT3  | HA  |
| 166 | 0     | 1 | 0   | 1 | # CT2 | CT1  | NH1  | H   |

|     |       |   |     |   |       |     |      |     |
|-----|-------|---|-----|---|-------|-----|------|-----|
| 167 | 0.1   | 1 | 0   | 1 | # CT2 | CT1 | NH3  | HC  |
| 168 | 0.05  | 3 | 180 | 1 | # CT2 | CT2 | CC   | NH2 |
| 169 | 0.05  | 3 | 180 | 1 | # CT2 | CT2 | CC   | O   |
| 170 | 0.05  | 3 | 180 | 1 | # CT2 | CT2 | CC   | OC  |
| 171 | 0.2   | 3 | 0   | 1 | # CT2 | CT2 | CT1  | HB  |
| 172 | 0.2   | 6 | 0   | 1 | # CT2 | CT2 | CT1  | NH1 |
| 173 | 0.2   | 6 | 0   | 1 | # CT2 | CT2 | CT1  | NH3 |
| 174 | 0.15  | 1 | 0   | 1 | # CT2 | CT2 | CT2  | CT2 |
| 175 | 0.195 | 1 | 0   | 1 | # CT2 | CT2 | CT2  | HA  |
| 176 | 0.195 | 1 | 0   | 1 | # CT2 | CT2 | CT2  | NC2 |
| 177 | 0.195 | 1 | 0   | 1 | # CT2 | CT2 | CT2  | NH3 |
| 178 | 0     | 1 | 180 | 1 | # CT2 | CT2 | NC2  | HC  |
| 179 | 0.1   | 1 | 0   | 1 | # CT2 | CT2 | NH3  | HC  |
| 180 | 0.24  | 2 | 180 | 1 | # CT2 | CT2 | S    | CT3 |
| 181 | 0.37  | 2 | 0   | 0 | # CT2 | CT2 | S    | CT3 |
| 182 | 1.2   | 2 | 180 | 1 | # CT2 | CY  | CA   | HP  |
| 183 | 3.5   | 2 | 180 | 1 | # CT2 | CY  | CA   | NY  |
| 184 | 2.25  | 2 | 180 | 1 | # CT2 | NC2 | C    | NC2 |
| 185 | 2.5   | 2 | 180 | 1 | # CT2 | NH1 | C    | O   |
| 186 | 0.28  | 2 | 0   | 1 | # CT2 | S   | CT3  | HA  |
| 187 | 0     | 2 | 0   | 1 | # CT3 | CT1 | C    | N   |
| 188 | 0     | 2 | 0   | 1 | # CT3 | CT1 | C    | NH1 |
| 189 | 1.4   | 6 | 0   | 1 | # CT3 | CT1 | C    | O   |
| 190 | 0.2   | 2 | 0   | 1 | # CT3 | CT1 | CT1  | HB  |
| 191 | 0.2   | 2 | 0   | 1 | # CT3 | CT1 | CT1  | NH1 |
| 192 | 0.2   | 2 | 0   | 1 | # CT3 | CT1 | CT2  | CT3 |
| 193 | 0.2   | 3 | 0   | 1 | # CT3 | CT1 | CT2  | HA  |
| 194 | 0.2   | 3 | 0   | 1 | # CT3 | CT1 | CT3  | HA  |
| 195 | 0     | 3 | 0   | 1 | # CT3 | CT1 | NH1  | H   |
| 196 | 1.33  | 3 | 0   | 1 | # CT3 | CT1 | OH1  | H   |
| 197 | 0.18  | 3 | 0   | 0 | # CT3 | CT1 | OH1  | H   |
| 198 | 0.32  | 3 | 0   | 0 | # CT3 | CT1 | OH1  | H   |
| 199 | 0.2   | 3 | 0   | 1 | # CT3 | CT2 | CT1  | HA  |
| 200 | 0.28  | 3 | 0   | 1 | # CT3 | S   | CT2  | HA  |
| 201 | 0.8   | 3 | 180 | 1 | # CY  | CA  | NY   | H   |
| 202 | 3     | 3 | 180 | 1 | # CY  | CPT | CA   | HP  |
| 203 | 5     | 3 | 180 | 0 | # CY  | CPT | CPT  | NY  |
| 204 | 0.2   | 3 | 0   | 1 | # CY  | CT2 | CT1  | HB  |
| 205 | 0.2   | 3 | 0   | 1 | # CY  | CT2 | CT1  | NH1 |
| 206 | 2.5   | 3 | 180 | 1 | # H   | NH1 | C    | O   |
| 207 | 0     | 3 | 0   | 1 | # H   | NH1 | CT1  | HB  |
| 208 | 0     | 3 | 0   | 1 | # H   | NH1 | CT2  | HB  |
| 209 | 1.4   | 3 | 180 | 1 | # H   | NH2 | CC   | O   |
| 210 | 1     | 3 | 180 | 1 | # H   | NR1 | CPH1 | HR3 |

|     |       |   |     |   |      |     |      |     |
|-----|-------|---|-----|---|------|-----|------|-----|
| 211 | 1     | 1 | 180 | 1 | # H  | NR1 | CPH2 | HR1 |
| 212 | 1     | 1 | 180 | 1 | # H  | NR1 | CPH2 | NR2 |
| 213 | 0.4   | 3 | 180 | 1 | # H  | NY  | CA   | HP  |
| 214 | 0.14  | 1 | 0   | 1 | # H  | OH1 | CT1  | HA  |
| 215 | 0.14  | 1 | 0   | 1 | # H  | OH1 | CT2  | HA  |
| 216 | 0.14  | 3 | 0   | 1 | # HA | CP2 | CP1  | HB  |
| 217 | 0.14  | 3 | 0   | 1 | # HA | CP2 | CP1  | N   |
| 218 | 0.16  | 3 | 0   | 1 | # HA | CP2 | CP2  | HA  |
| 219 | 0.14  | 3 | 0   | 1 | # HA | CP2 | CP3  | HA  |
| 220 | 0.14  | 6 | 0   | 1 | # HA | CP2 | CP3  | N   |
| 221 | 0.2   | 6 | 0   | 1 | # HA | CT1 | CT1  | HB  |
| 222 | 0.2   | 1 | 0   | 1 | # HA | CT1 | CT1  | NH1 |
| 223 | 0.2   | 1 | 0   | 1 | # HA | CT1 | CT2  | HA  |
| 224 | 0.2   | 1 | 0   | 1 | # HA | CT1 | CT3  | HA  |
| 225 | 0     | 1 | 180 | 1 | # HA | CT2 | CC   | NH2 |
| 226 | 0     | 1 | 180 | 1 | # HA | CT2 | CC   | O   |
| 227 | 0.05  | 1 | 180 | 1 | # HA | CT2 | CC   | OC  |
| 228 | 0.19  | 2 | 0   | 1 | # HA | CT2 | CPH1 | NR2 |
| 229 | 0.2   | 2 | 0   | 1 | # HA | CT2 | CT1  | HB  |
| 230 | 0.2   | 2 | 0   | 1 | # HA | CT2 | CT1  | NH1 |
| 231 | 0.2   | 2 | 0   | 1 | # HA | CT2 | CT1  | NH3 |
| 232 | 0.195 | 2 | 0   | 1 | # HA | CT2 | CT2  | HA  |
| 233 | 0.195 | 2 | 0   | 1 | # HA | CT2 | CT2  | NC2 |
| 234 | 0.195 | 2 | 0   | 1 | # HA | CT2 | CT2  | NH3 |
| 235 | 0.01  | 2 | 0   | 1 | # HA | CT2 | CT2  | S   |
| 236 | 0.16  | 2 | 0   | 1 | # HA | CT2 | CT3  | HA  |
| 237 | 0     | 6 | 180 | 1 | # HA | CT2 | NC2  | HC  |
| 238 | 0.1   | 2 | 0   | 1 | # HA | CT2 | NH3  | HC  |
| 239 | 0.2   | 2 | 0   | 1 | # HA | CT2 | S    | HS  |
| 240 | 0.2   | 2 | 0   | 1 | # HA | CT3 | CT1  | HB  |
| 241 | 0.2   | 3 | 0   | 1 | # HA | CT3 | CT1  | NH1 |
| 242 | 0.2   | 3 | 0   | 1 | # HA | CT3 | CT1  | OH1 |
| 243 | 0.4   | 3 | 180 | 1 | # HB | CP1 | C    | NH1 |
| 244 | 0.6   | 3 | 0   | 0 | # HB | CP1 | C    | NH1 |
| 245 | 0.4   | 3 | 0   | 1 | # HB | CP1 | C    | O   |
| 246 | 0.6   | 3 | 0   | 0 | # HB | CP1 | C    | O   |
| 247 | 0     | 3 | 0   | 1 | # HB | CT1 | C    | N   |
| 248 | 0     | 3 | 0   | 1 | # HB | CT1 | C    | NH1 |
| 249 | 0     | 3 | 0   | 1 | # HB | CT1 | C    | O   |
| 250 | 0.05  | 3 | 180 | 1 | # HB | CT1 | CC   | OC  |
| 251 | 0.2   | 3 | 0   | 1 | # HB | CT1 | CT1  | OH1 |
| 252 | 0.2   | 3 | 0   | 1 | # HB | CT1 | CT2  | OH1 |
| 253 | 0.2   | 3 | 0   | 1 | # HB | CT1 | CT2  | S   |
| 254 | 0.1   | 3 | 0   | 1 | # HB | CT1 | NH3  | HC  |

|     |      |   |     |   |       |      |      |     |
|-----|------|---|-----|---|-------|------|------|-----|
| 255 | 0    | 3 | 0   | 1 | # HB  | CT2  | C    | NH1 |
| 256 | 0    | 3 | 0   | 1 | # HB  | CT2  | C    | O   |
| 257 | 2.25 | 3 | 180 | 1 | # HC  | NC2  | C    | NC2 |
| 258 | 2.4  | 3 | 180 | 1 | # HP  | CA   | CA   | HP  |
| 259 | 4.2  | 1 | 180 | 1 | # HP  | CA   | CA   | OH1 |
| 260 | 3    | 1 | 180 | 1 | # HP  | CA   | CPT  | NY  |
| 261 | 3    | 3 | 180 | 1 | # HR3 | CPH1 | CPH1 | NR2 |
| 262 | 0.4  | 1 | 0   | 1 | # N   | C    | CT1  | NH1 |
| 263 | 0.3  | 1 | 0   | 1 | # N   | CP1  | C    | NH1 |
| 264 | -0.3 | 3 | 0   | 0 | # N   | CP1  | C    | NH1 |
| 265 | -0.3 | 3 | 0   | 1 | # N   | CP1  | C    | O   |
| 266 | 0.6  | 3 | 0   | 1 | # NH1 | C    | CT1  | NH1 |
| 267 | 0.6  | 3 | 0   | 1 | # NH1 | C    | CT1  | NH3 |
| 268 | 0.6  | 6 | 0   | 1 | # NH1 | C    | CT2  | NH1 |
| 269 | 0    | 6 | 0   | 1 | # NH1 | CT1  | C    | O   |
| 270 | 0.05 | 1 | 180 | 1 | # NH1 | CT1  | CC   | OC  |
| 271 | 0.2  | 1 | 0   | 1 | # NH1 | CT1  | CT1  | OH1 |
| 272 | 0.2  | 1 | 0   | 1 | # NH1 | CT1  | CT2  | OH1 |
| 273 | 0.2  | 1 | 0   | 1 | # NH1 | CT1  | CT2  | S   |
| 274 | 0    | 1 | 0   | 1 | # NH1 | CT2  | C    | O   |
| 275 | 0    | 1 | 0   | 1 | # NH3 | CT1  | C    | O   |
| 276 | 14   | 2 | 180 | 0 | # NR1 | CPH1 | CPH1 | NR2 |

...

### Improper Coeffs

|    |      |   |        |      |      |     |
|----|------|---|--------|------|------|-----|
| 1  | 120  | 0 | # C    | CP1  | NH1  | O   |
| 2  | 120  | 0 | # C    | CT1  | N    | O   |
| 3  | 120  | 0 | # C    | CT1  | NH1  | O   |
| 4  | 120  | 0 | # C    | CT2  | NH1  | O   |
| 5  | 40   | 0 | # C    | NC2  | NC2  | NC2 |
| 6  | 96   | 0 | # CC   | CT1  | OC   | OC  |
| 7  | 45   | 0 | # CC   | CT2  | NH2  | O   |
| 8  | 96   | 0 | # CC   | CT2  | OC   | OC  |
| 9  | 45   | 0 | # CC   | NH2  | CT2  | O   |
| 10 | 0    | 0 | # CP3  | CP1  | C    | N   |
| 11 | 0.5  | 0 | # CPH1 | CPH1 | NR1  | HR3 |
| 12 | 0.5  | 0 | # CPH1 | NR1  | CPH1 | HR3 |
| 13 | 0.5  | 0 | # CPH2 | NR1  | NR2  | HR1 |
| 14 | 0.5  | 0 | # CPH2 | NR2  | NR1  | HR1 |
| 15 | 0.45 | 0 | # H    | CPH1 | CPH2 | NR1 |
| 16 | 0.45 | 0 | # H    | CPH2 | CPH1 | NR1 |
| 17 | 20   | 0 | # H    | CT1  | C    | NH1 |
| 18 | 20   | 0 | # H    | CT2  | C    | NH1 |
| 19 | 4    | 0 | # H    | H    | CC   | NH2 |

Lammps script:

...

bond\_style harmonic

angle\_style charmm

dihedral\_style charmm

improper\_style harmonic

pair\_style lj/charmm/coul/long 10 12

...



## References

1. T.-J. Lin and H. Heinz, *J. Phys. Chem. C*, 2016, **120**, 4975–4992.
2. K. Makrodimitris, D. L. Masica, E. T. Kim and J. J. Gray, *J. Am. Chem. Soc.*, 2007, **129**, 13713–13722.
3. R. F. Alford, A. Leaver-Fay, J. R. Jeliazkov, M. J. O'Meara, F. P. DiMaio, H. Park, M. V. Shapovalov, P. D. Renfrew, V. K. Mulligan, K. Kappel, J. W. Labonte, M. S. Pacella, R. Bonneau, P. Bradley, R. L. Dunbrack, Jr., R. Das, D. Baker, B. Kuhlman, T. Kortemme and J. J. Gray, *J. Chem. Theory Comput.*, 2017, **13**, 3031–3048.
